# Supplementary material for: First-principles study of CdSe nanoribbons under uniaxial tensile strain
Source: Royal Society of Chemistry journal article supplement (doi:10.1039/d3nj01105d), 2023-01-01
Supplement: d3nj01105d1.pdf [file d3nj01105d1.pdf]

## Supporting Information

### First-principles Study of CdSe Nanoribbon Under Uniaxial Tensile Strain

Bing Fu<sup>1</sup>, Xiaozhe Yang<sup>1</sup>, Guolong Yu<sup>2</sup>, Liangrong Li<sup>1\*</sup>, Gang Feng<sup>3</sup>

<sup>1</sup>Fuzhou Medical College, Nanchang University, Fuzhou 344000, P. R. China

<sup>2</sup>Department of Physics, Shanghai Normal University, Shanghai 200234, P. R. China

<sup>3</sup>School of Chemistry and Chemical Engineering, Nanchang University, Nanchang, 344000, P. R. China

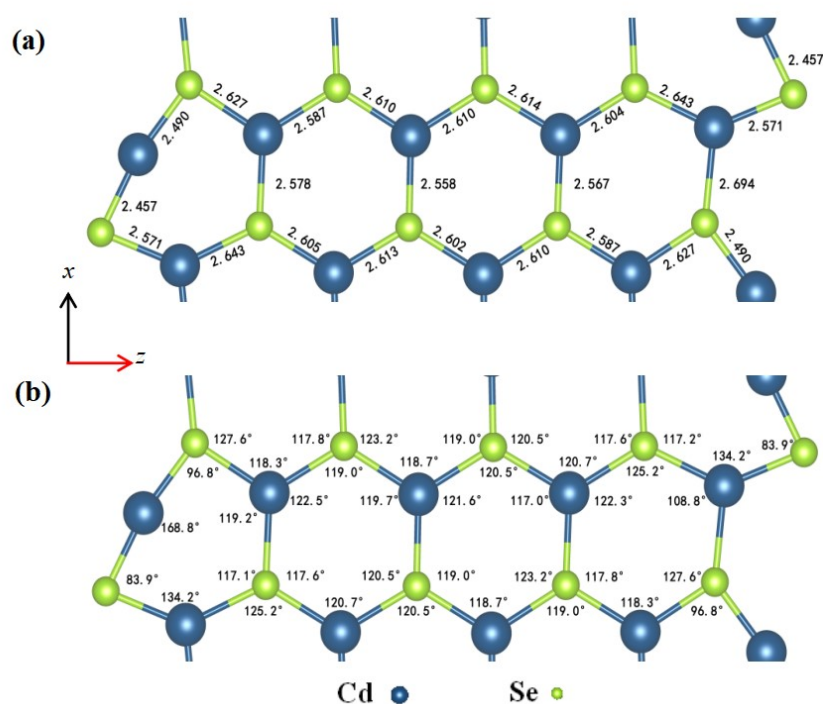

**Figure S1.** The details of (a) bond length and (b) bond angle of optimized ACdSeNR.

\* Email address: ncurong@163.com (Liangrong Li)

Tel.: +86 0794 8251661; fax: +86 0794 8251680

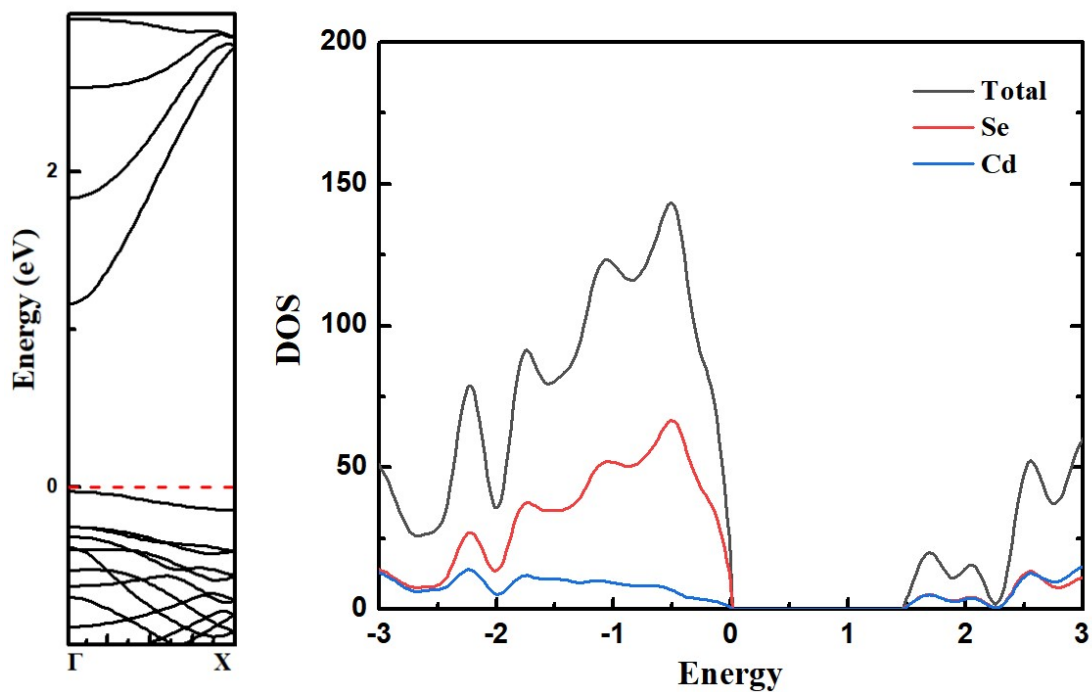

**Figure S2.** Band structure (left) and Density of states (DOS) (right) of pristine ACdSeNR, with Fermi energy scaled to zero.
